# Supplementary material for: Septins function in exocytosis via physical interactions with the exocyst complex in fission yeast cytokinesis
Source: eLife journal article supplement (doi:10.7554/elife.101113), 2024-09-05
Supplement: fig4-data2 [file Figure 4 source files labeled.pdf › Figure 4-source data 2/Figure 4 source files labeled.pdf]

Figure 4 panel A  
labeled

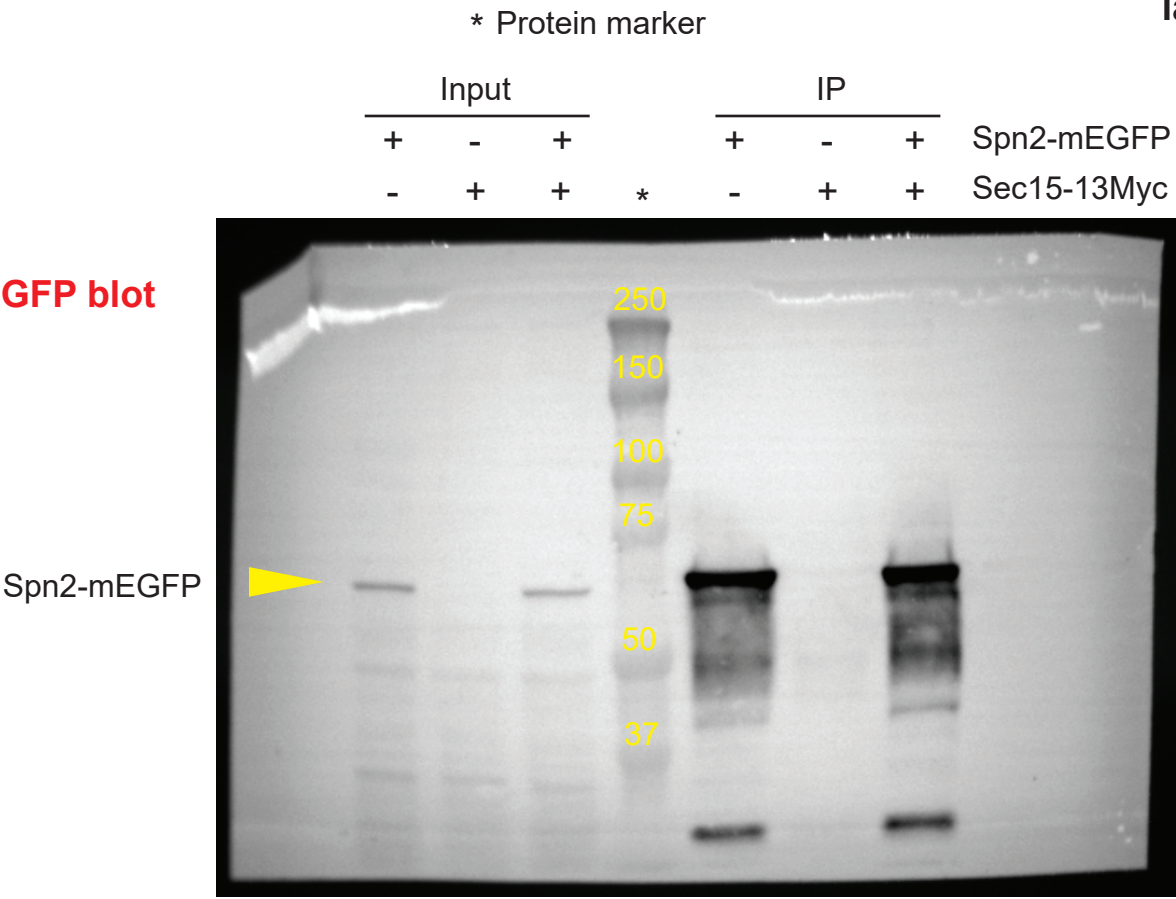

**Note:** White illumination near the edges of the blots are unwanted reflection of liquid from membrane and does not appear in chemiluminisence channel.

**Figure 4 panel A  
labeled**

\* Protein marker

| Input |   |   |   | IP |   |   |             |
|-------|---|---|---|----|---|---|-------------|
| +     | - |   | + | +  | - | + | Spn2-mEGFP  |
| -     | + | * | + | -  | + | + | Sec15-13Myc |

**Myc blot**

Sec15-13Myc  
  
Tubulin  
(Not used in paper)

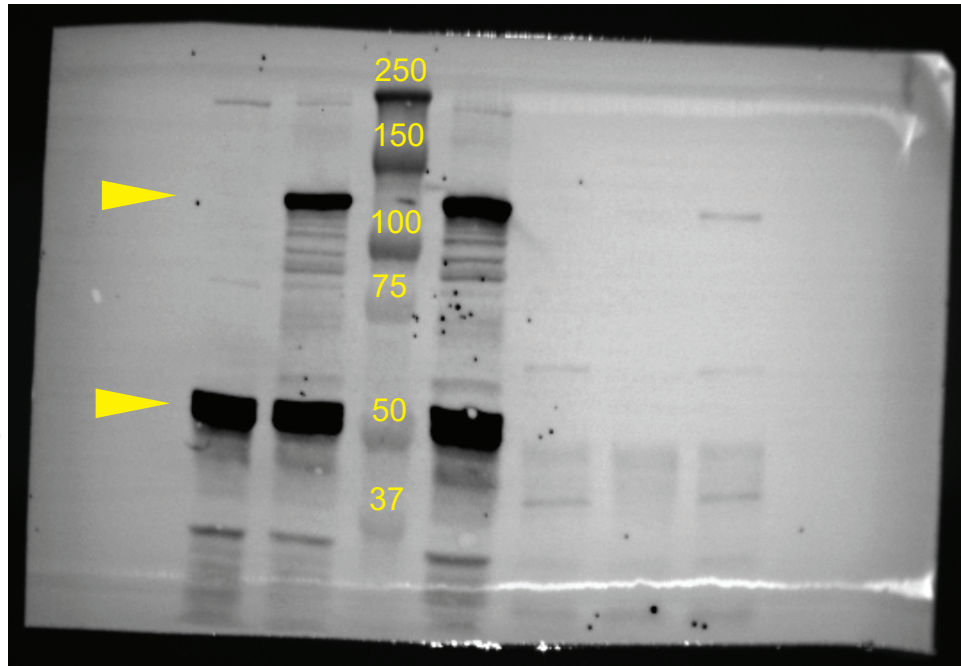

Long exposure

| Input |   |   |   | IP |   |   |             |
|-------|---|---|---|----|---|---|-------------|
| +     | - |   | + | +  | - | + | Spn2-mEGFP  |
| -     | + | * | + | -  | + | + | Sec15-13Myc |

**Myc blot**

Sec15-13Myc  
  
Tubulin

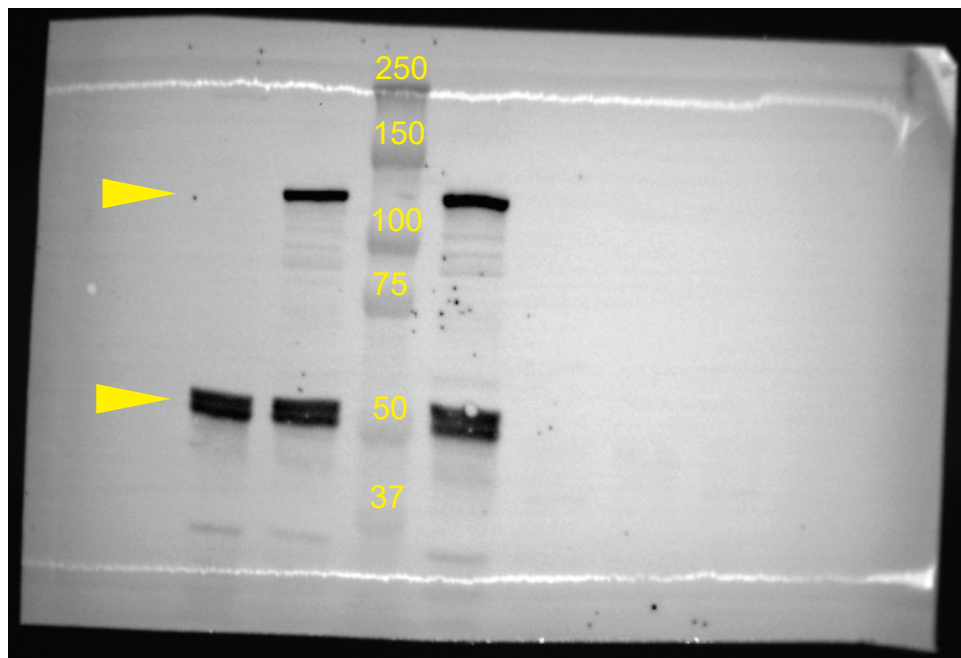

Short exposure

**Note:** White illumination near the edges of the blots are unwanted reflection of liquid from membrane and does not appear in chemiluminescence channel.

Figure 4 panel B  
labeled

\* Protein marker

| Input |   |   |   | IP |   |   |             |
|-------|---|---|---|----|---|---|-------------|
| +     | - | + |   | +  | - | + | Spn2-13Myc  |
| -     | + | + | * | -  | + | + | Sec15-mEGFP |

GFP blot

Sec15-mEGFP

Tubulin

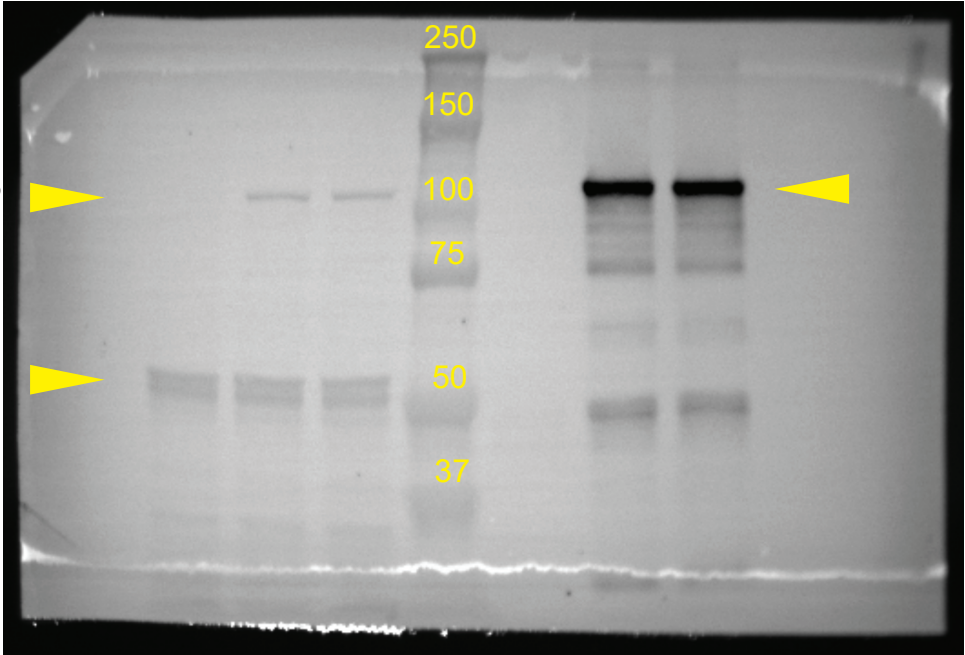

| Input |   |   |   | IP |   |   |             |
|-------|---|---|---|----|---|---|-------------|
| +     | - | + |   | +  | - | + | Spn2-13Myc  |
| -     | + | * | + | -  | + | + | Sec15-mEGFP |

Myc blot

Spn2-13Myc

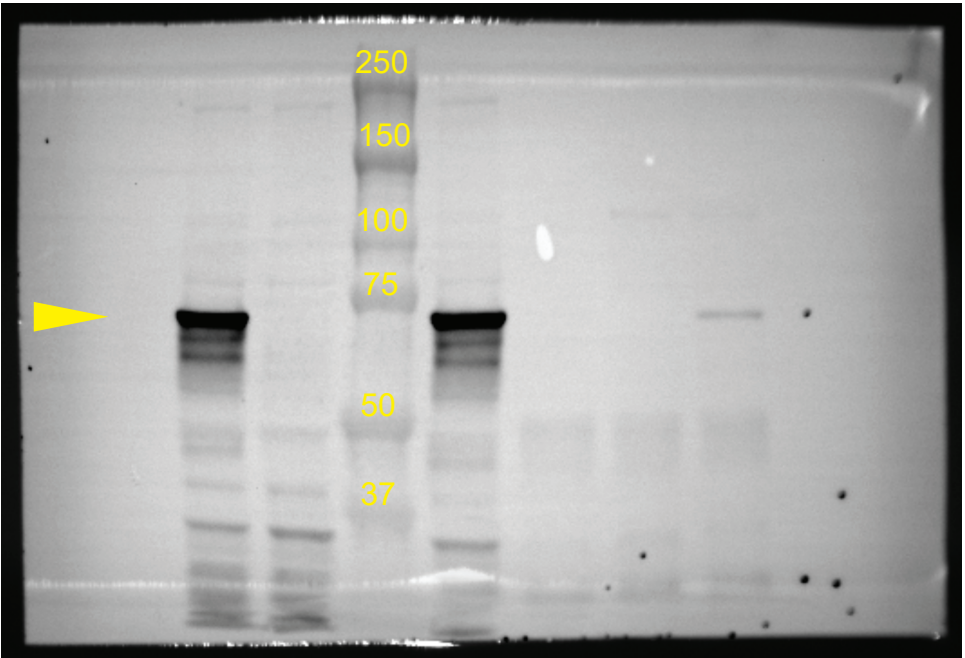

**Note:** White illumination near the edges of the blots are unwanted reflection of liquid from membrane and does not appear in chemiluminisence channel.

**Figure 4 panel C  
labeled**

\* Protein marker

| Input |   |   |   | IP |   |   |  |             |
|-------|---|---|---|----|---|---|--|-------------|
| +     | - | + |   | +  | - | + |  | Spn1-mEGFP  |
| -     | + | + | * | -  | + | + |  | Sec15-13Myc |

**GFP blot**

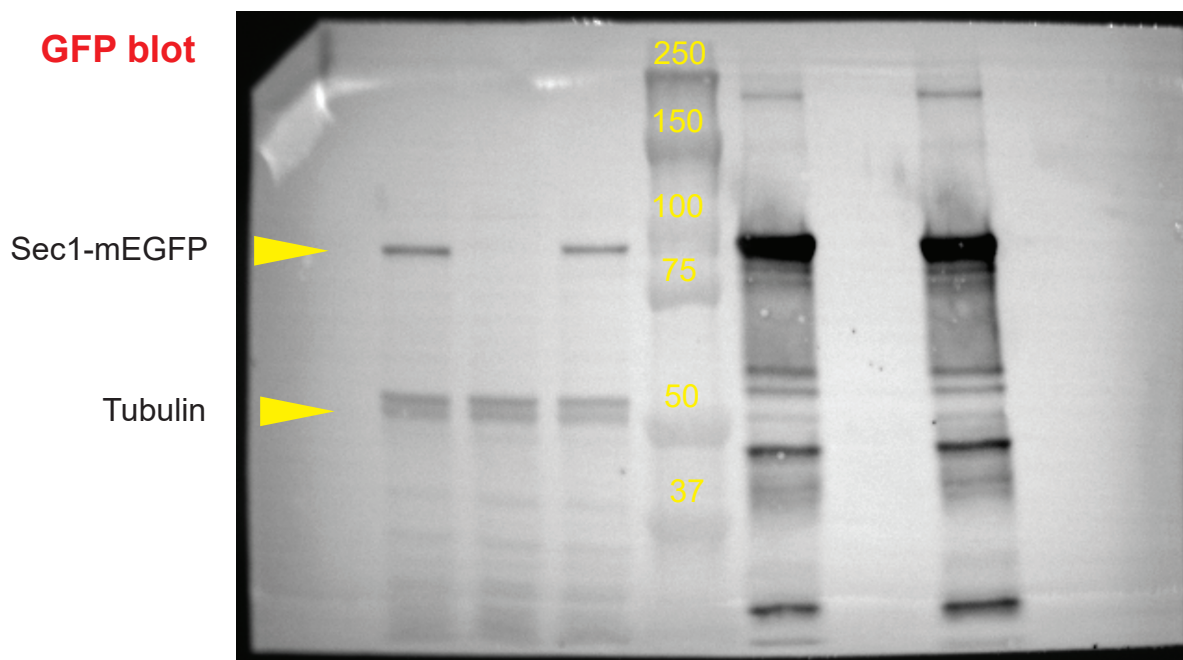

| Input |   |   |   | IP |   |   |  |             |
|-------|---|---|---|----|---|---|--|-------------|
| +     | - |   | + | +  | - | + |  | Spn1-mEGFP  |
| -     | + | * | + | -  | + | + |  | Sec15-13Myc |

**Myc blot**

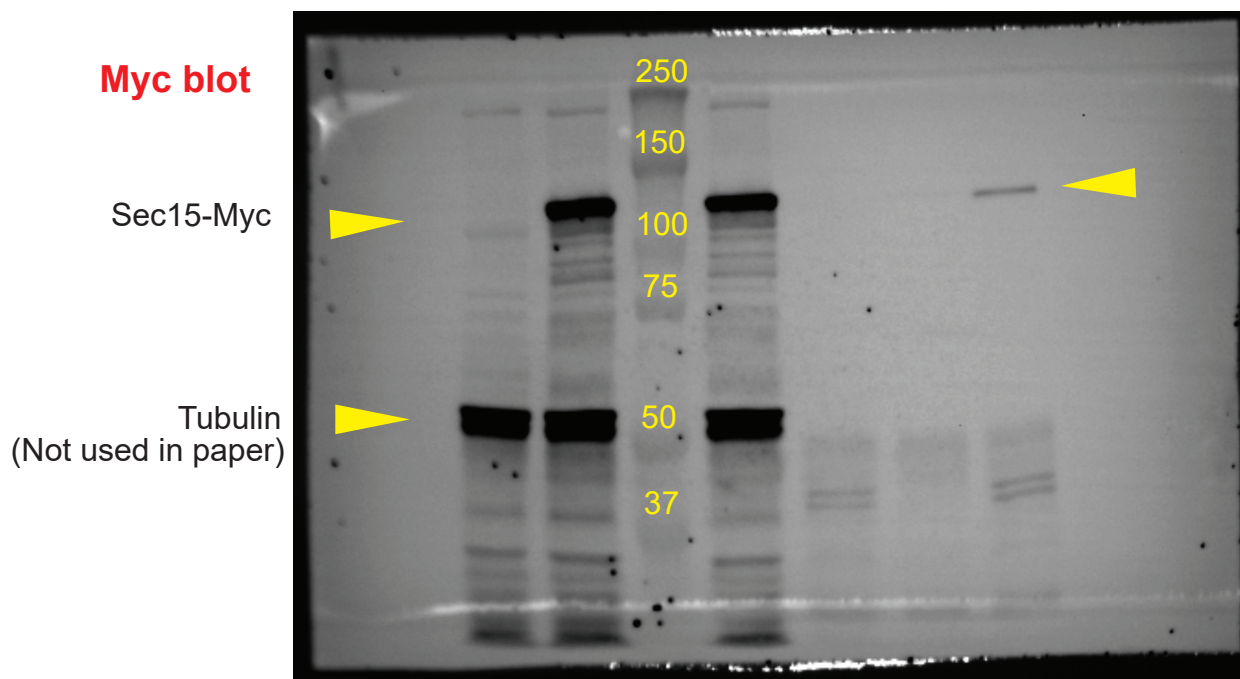

**Note:** White illumination near the edges of the blots are unwanted reflection of liquid from membrane and does not appear in chemiluminescence channel.

**Figure 4 panel D  
labeled**

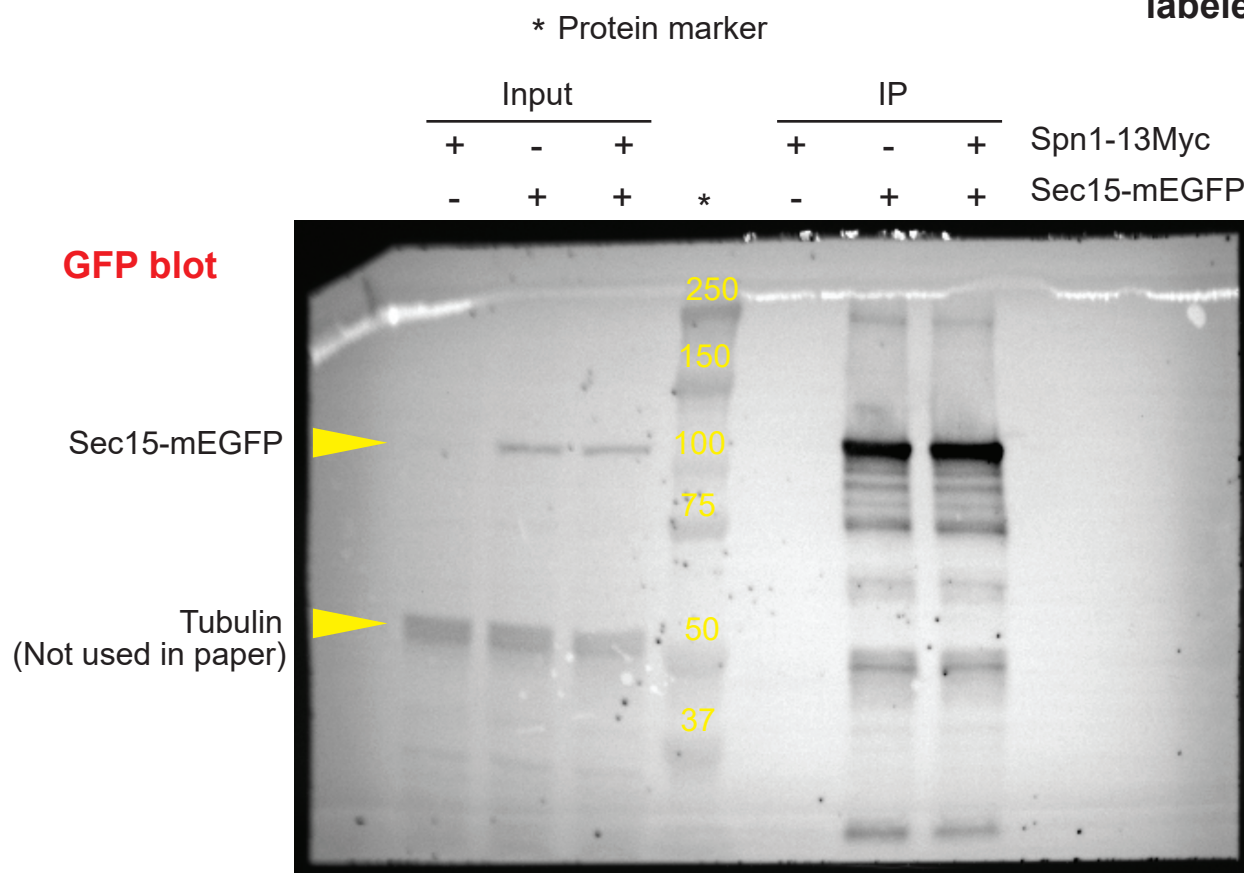

**Note:** White illumination near the edges of the blots are unwanted reflection of liquid from membrane and does not appear in chemiluminisence channel.

**Figure 4 panel D**  
**labeled**

| Input |   |   |   | IP |   |   |             |
|-------|---|---|---|----|---|---|-------------|
| +     | - |   | + | +  | - | + | Spn1-13Myc  |
| -     | + | * | + | -  | + | + | Sec15-mEGFP |

**Myc blot**

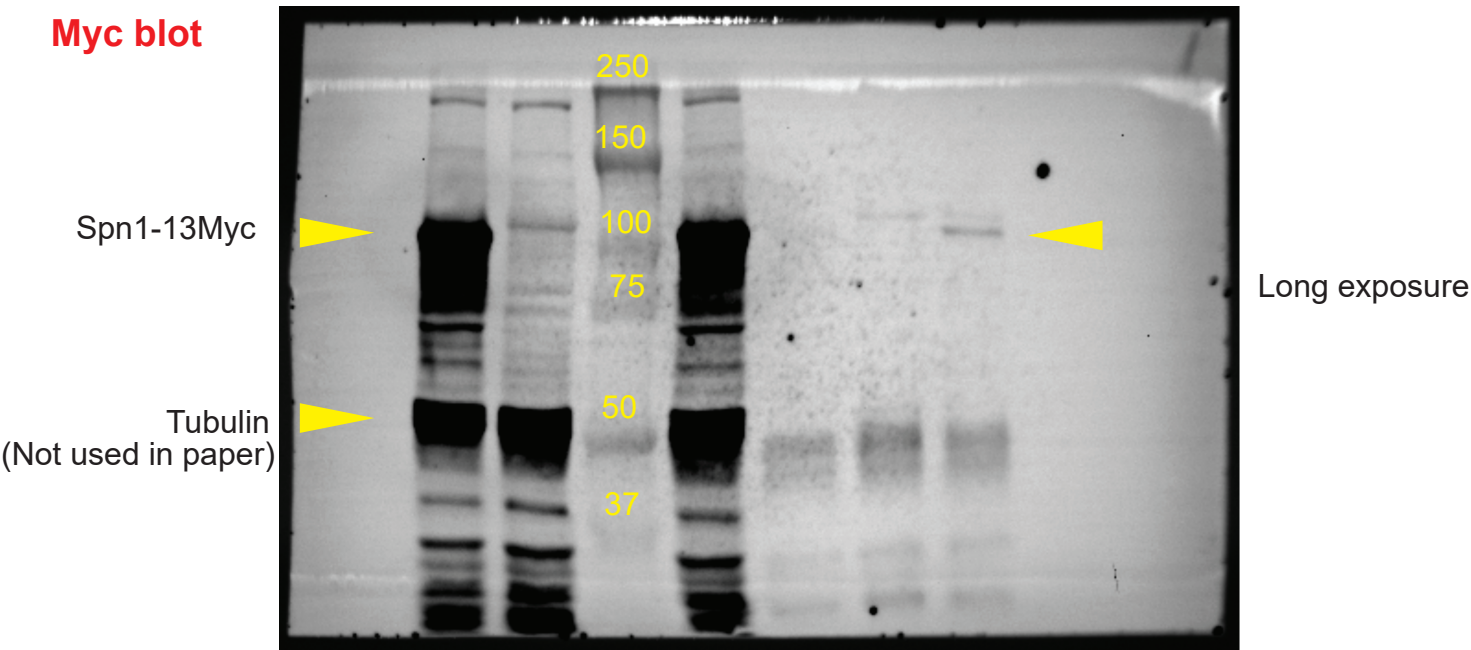

| Input |   |   |   | IP |   |   |             |
|-------|---|---|---|----|---|---|-------------|
| +     | - |   | + | +  | - | + | Spn1-13Myc  |
| -     | + | * | + | -  | + | + | Sec15-mEGFP |

**Myc blot**

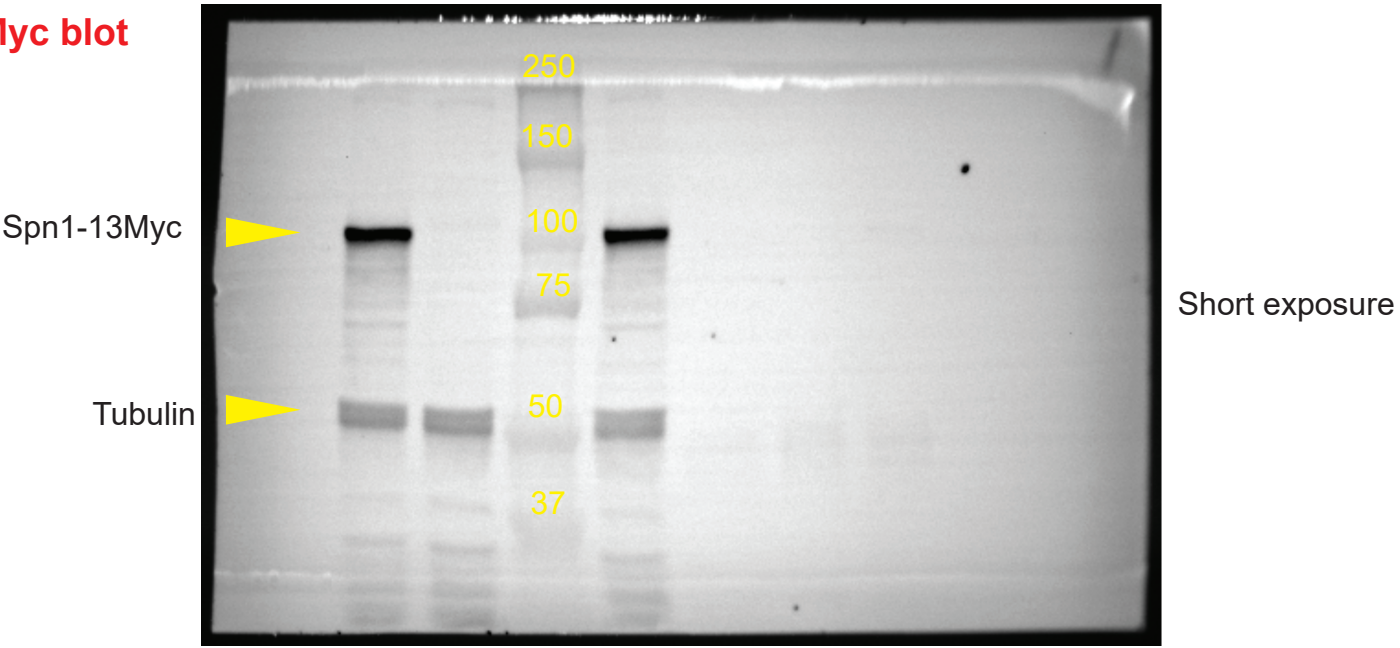

**Note:** White illumination near the edges of the blots are unwanted reflection of liquid from membrane and does not appear in chemiluminisence channel.
