# Supplementary material for: Septins function in exocytosis via physical interactions with the exocyst complex in fission yeast cytokinesis
Source: eLife journal article supplement (doi:10.7554/elife.101113), 2024-09-05
Supplement: fig4-figsupp1-data2 [file Figure 4-figure supplement 1-source files labeled.pdf › Figure 4-figure supplement 1-source data 2/Figure 4-figure supplement 1-source files labeled.pdf]

Figure 4-figure supplement 1  
panel A labeled

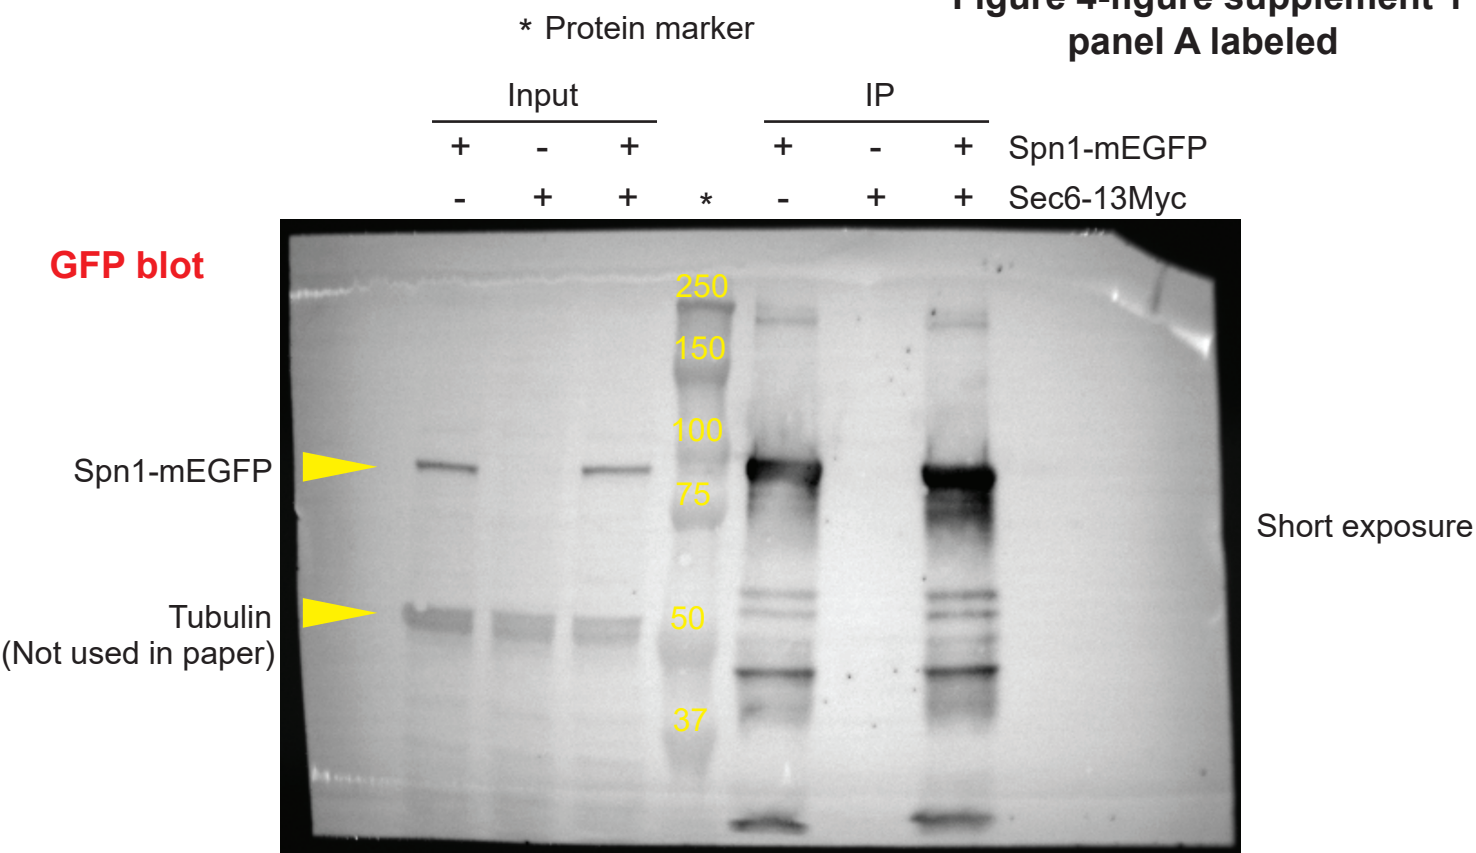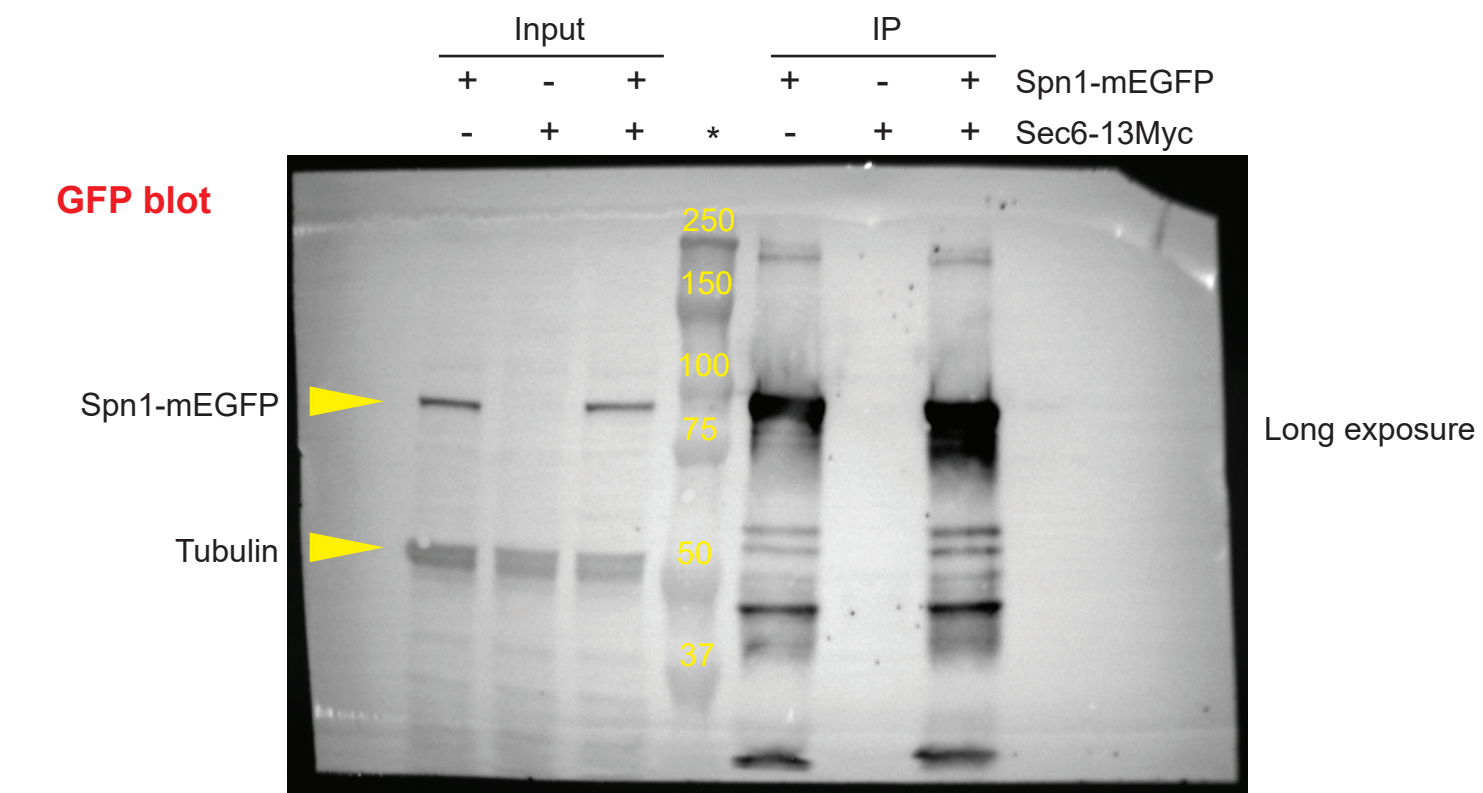

**Note:** White illumination near the edges of the blots are unwanted reflection of liquid from membrane and does not appear in chemiluminisence channel.

Figure 4-figure supplement 1  
panel A labeled

\* Protein marker

| Input |   |   |   | IP |   |   |            |
|-------|---|---|---|----|---|---|------------|
| +     | - |   | + | +  | - | + | Spn1-mEGFP |
| -     | + | * | + | -  | + | + | Sec6-13Myc |

Myc blot

Sec6-13Myc

Tubulin  
(Not used in paper)

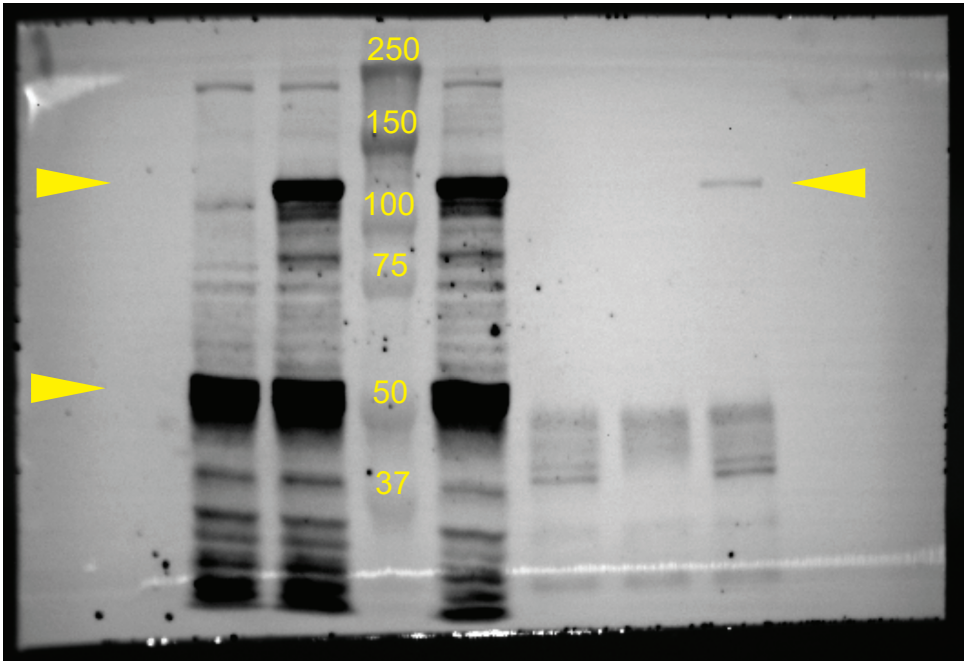

**Note:** White illumination near the edges of the blots are unwanted reflection of liquid from membrane and does not appear in chemiluminisence channel.



**Figure 4-figure supplement 1  
panel B labeled**

\* Protein marker

| Input |   |   |   | IP |   |   |            |
|-------|---|---|---|----|---|---|------------|
| +     | - | + |   | +  | - | + | Spn1-13Myc |
| -     | + | + | * | -  | + | + | Sec6-mEGFP |

**GFP blot**

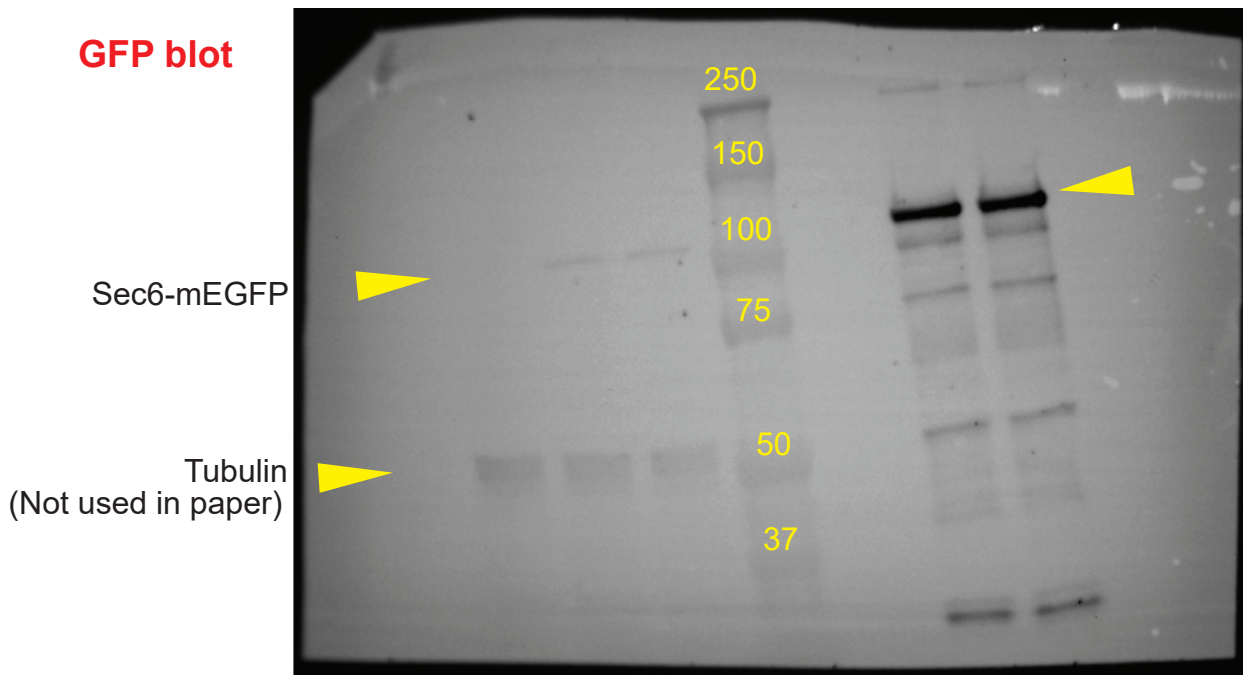

**Note:** White illumination near the edges of the blots are unwanted reflection of liquid from membrane and does not appear in chemiluminisence channel.

Figure 4-figure supplement 1  
panel B labeled

| * Protein marker |  |  |  | Input |   |   | IP |   |   |            |
|------------------|--|--|--|-------|---|---|----|---|---|------------|
|                  |  |  |  | +     | - | + | +  | - | + | Spn1-13Myc |
|                  |  |  |  | -     | + | * | +  | - | + | Sec6-mEGFP |

Myc blot

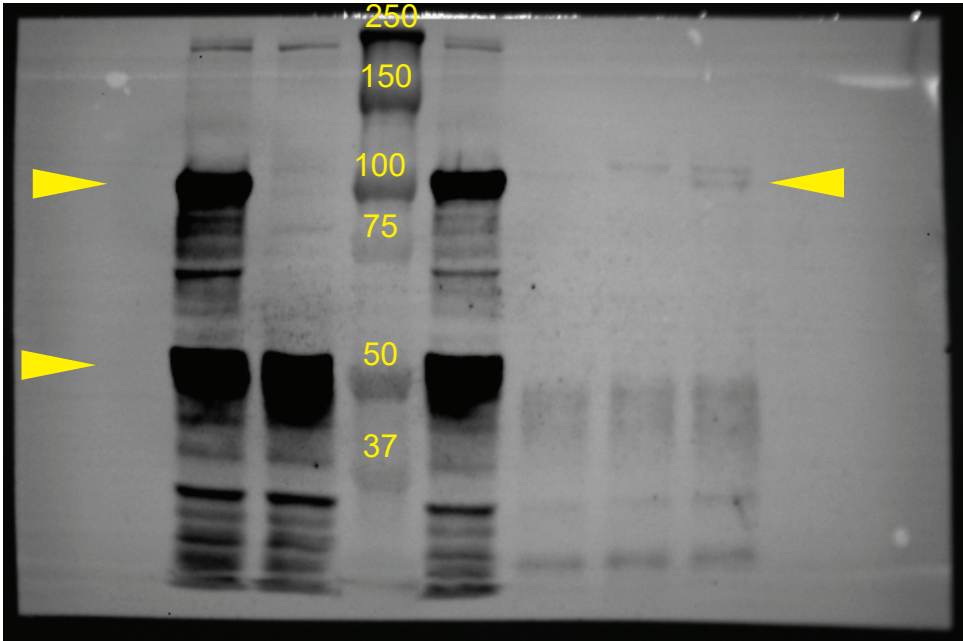

|  |  |  |  | Input |   |   | IP |   |   |            |
|--|--|--|--|-------|---|---|----|---|---|------------|
|  |  |  |  | +     | - | + | +  | - | + | Spn1-13Myc |
|  |  |  |  | -     | + | * | +  | - | + | Sec6-mEGFP |

Myc blot

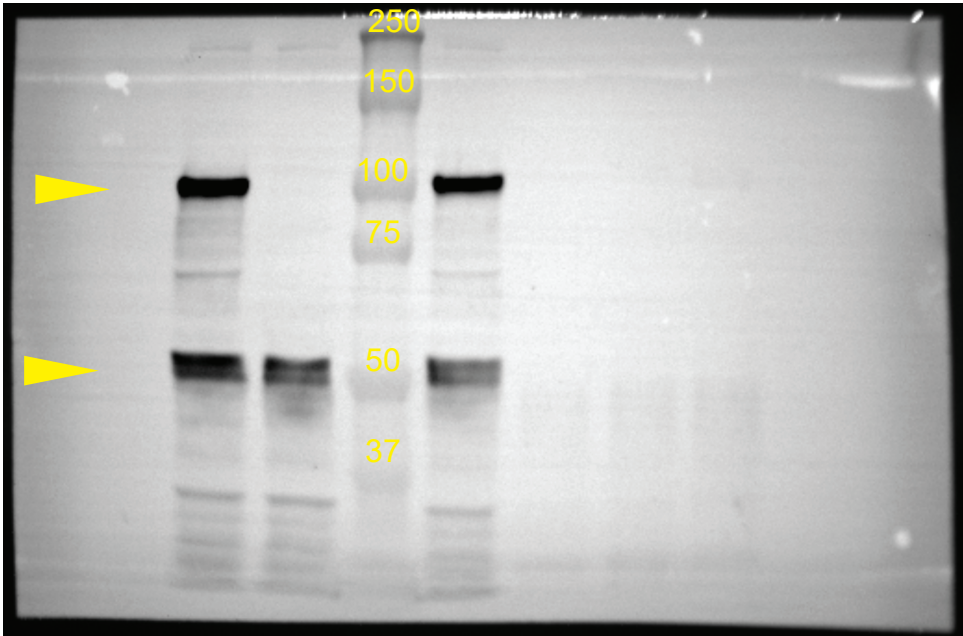

**Note:** White illumination near the edges of the blots are unwanted reflection of liquid from membrane and does not appear in chemiluminisence channel.

Figure 4-figure supplement 1  
panel C labeled

| * Protein marker |   |   |   |    |   |   |            |
|------------------|---|---|---|----|---|---|------------|
| Input            |   |   |   | IP |   |   |            |
| +                | - | + |   | +  | - | + | Spn2-mEGFP |
| -                | + | + | * | -  | + | + | Sec5-13Myc |

GFP blot

Spn2-mEGFP

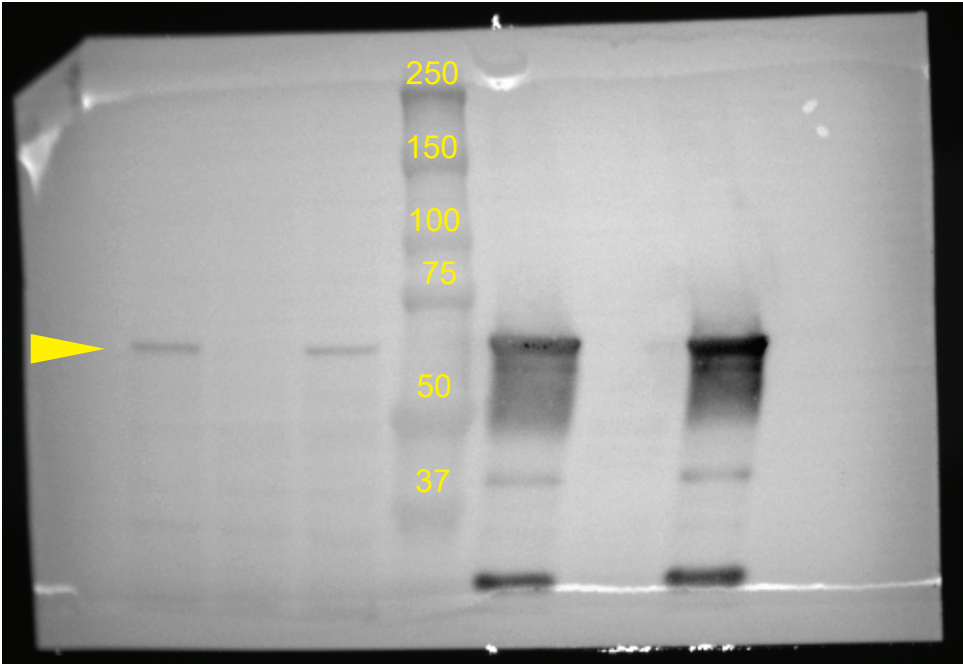

**Note:** White illumination near the edges of the blots are unwanted reflection of liquid from membrane and does not appear in chemiluminisence channel.

**Figure 4-figure supplement 1  
panel C labeled**

\* Protein marker

| Input |   |   |   | IP |   |   |            |
|-------|---|---|---|----|---|---|------------|
| +     | - |   | + | +  | - | + | Spn2-mEGFP |
| -     | + | * | + | -  | + | + | Sec5-13Myc |

**Myc blot**

Sec5-13Myc  
  
Tubulin  
(Not used in paper)

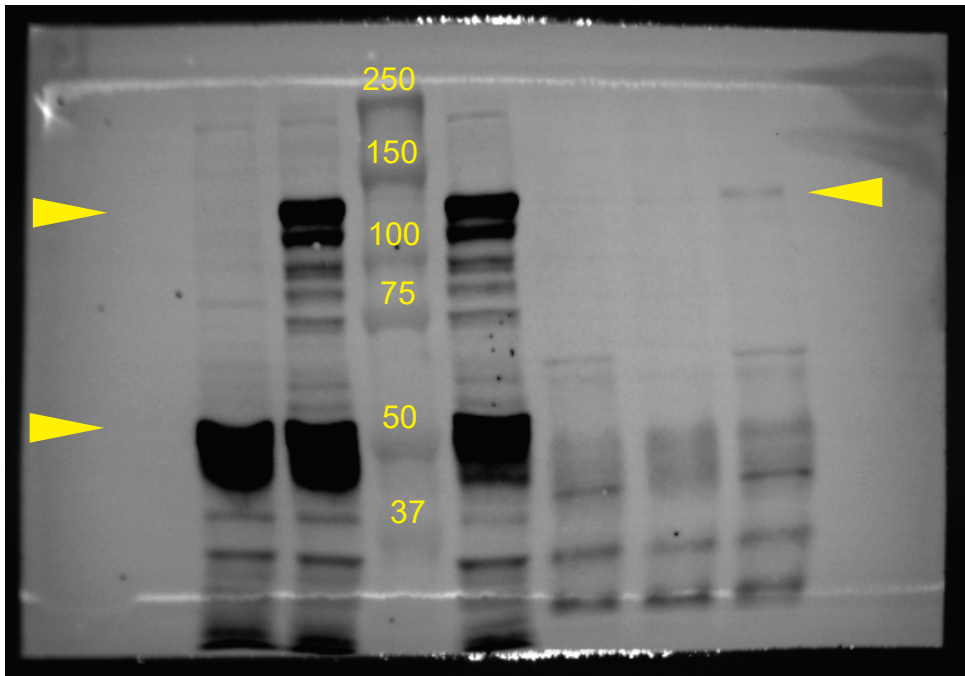

Long exposure

| Input |   |   |   | IP |   |   |            |
|-------|---|---|---|----|---|---|------------|
| +     | - |   | + | +  | - | + | Spn2-mEGFP |
| -     | + | * | + | -  | + | + | Sec5-13Myc |

**Myc blot**

Sec5-13Myc  
  
Tubulin

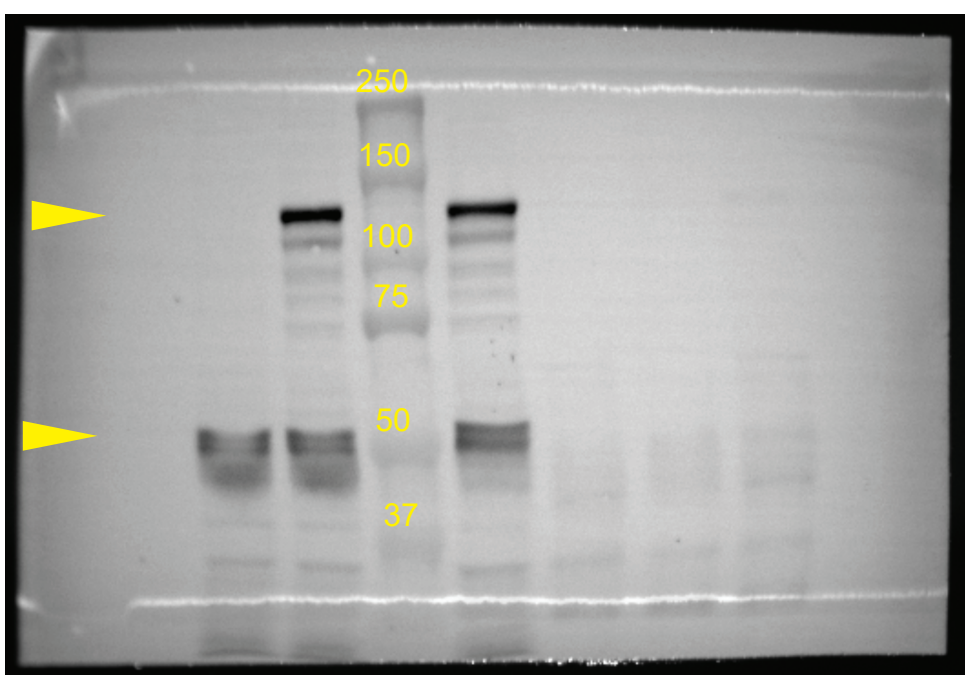

Short exposure

**Note:** White illumination near the edges of the blots are unwanted reflection of liquid from membrane and does not appear in chemiluminescence channel.



**Figure 4-figure supplement 1**  
**panel D labeled**

\* Protein marker

| Input |   |   |   | IP |   |   |            |
|-------|---|---|---|----|---|---|------------|
| +     | - | + |   | +  | - | + | Spn2-13Myc |
| -     | + | + | * | -  | + | + | Sec5-mEGFP |

**GFP blot**

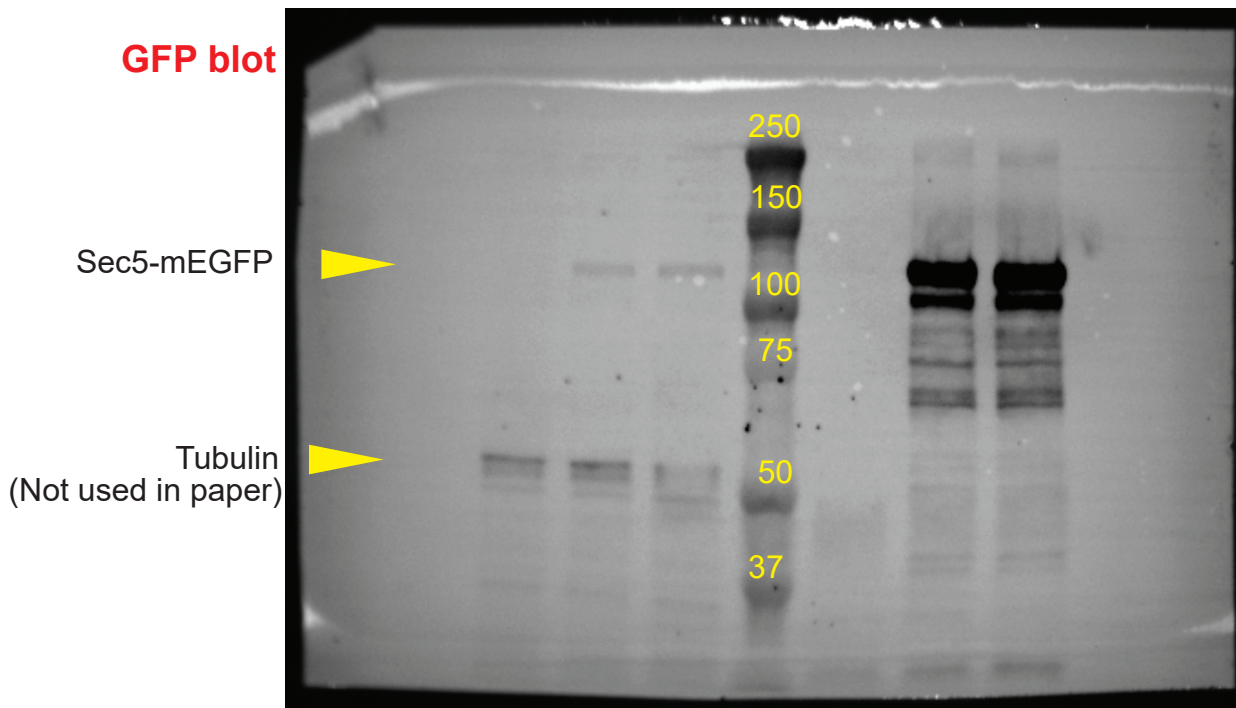

**Note:** White illumination near the edges of the blots are unwanted reflection of liquid from membrane and does not appear in chemiluminisence channel.

Figure 4-figure supplement 1  
panel D labeled

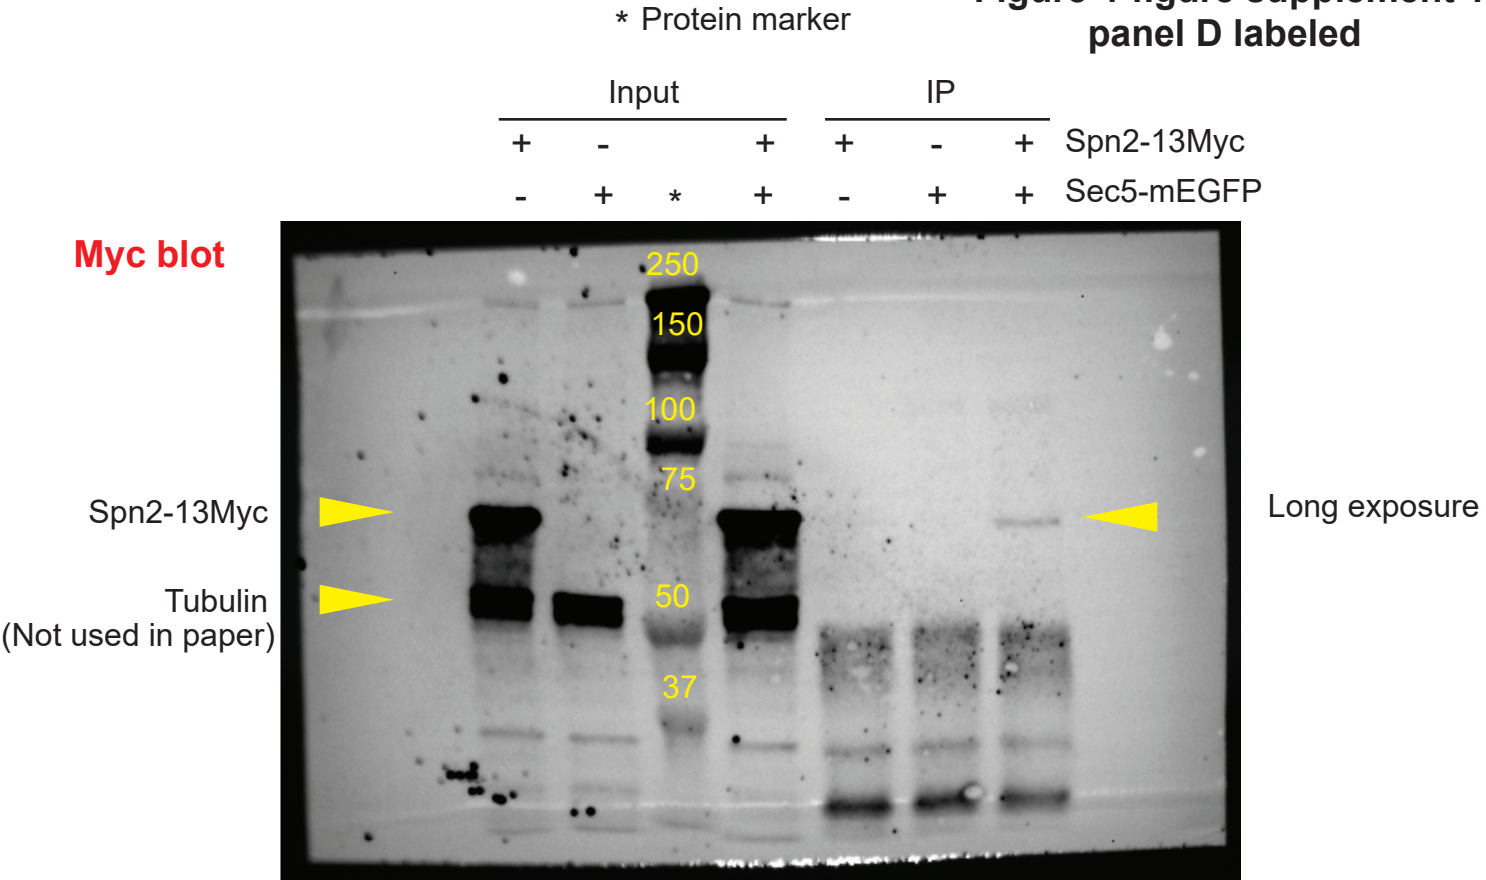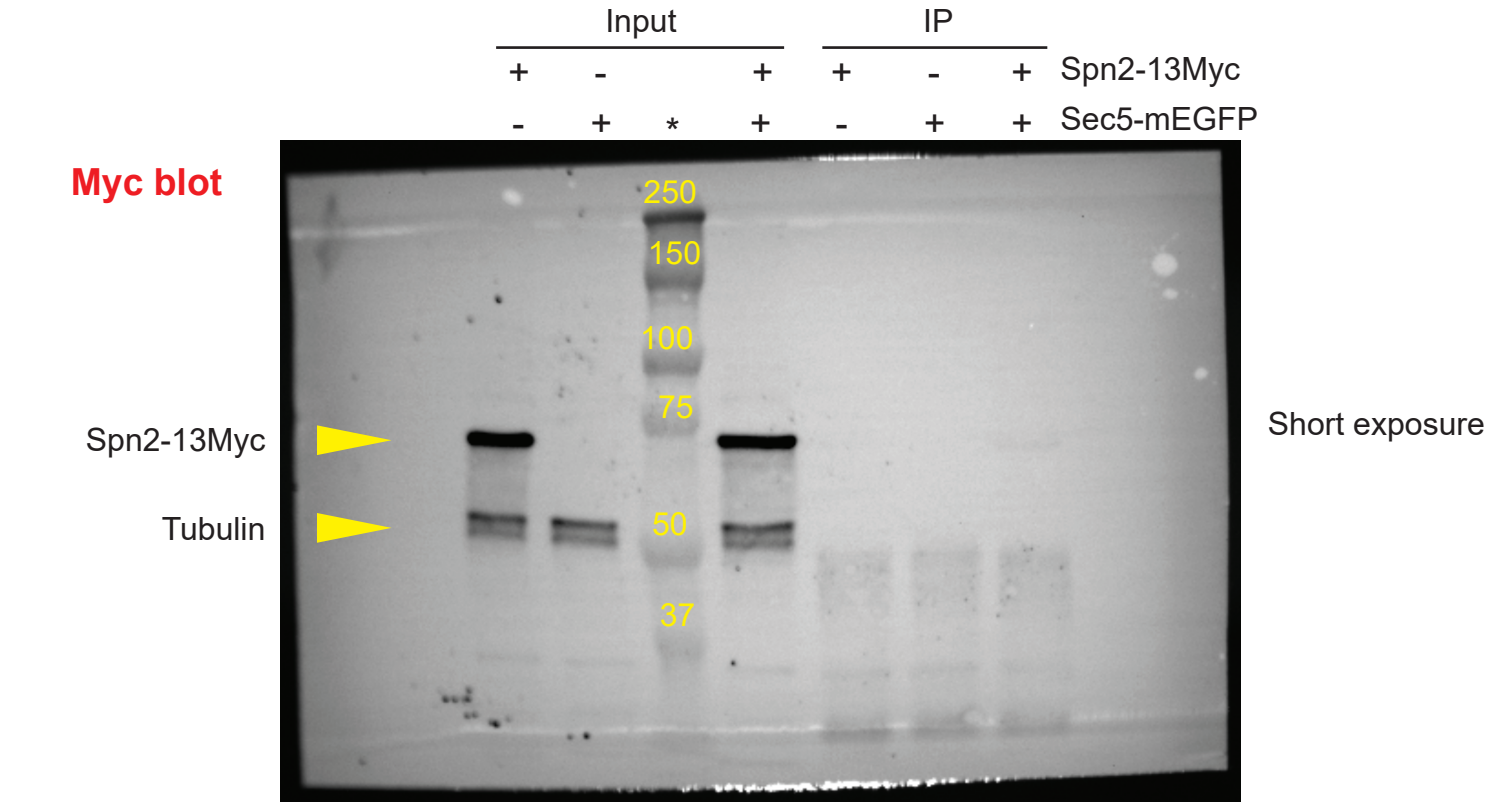

**Note:** White illumination near the edges of the blots are unwanted reflection of liquid from membrane and does not appear in chemiluminisence channel.

**Figure 4-figure supplement 1  
panel E labeled**

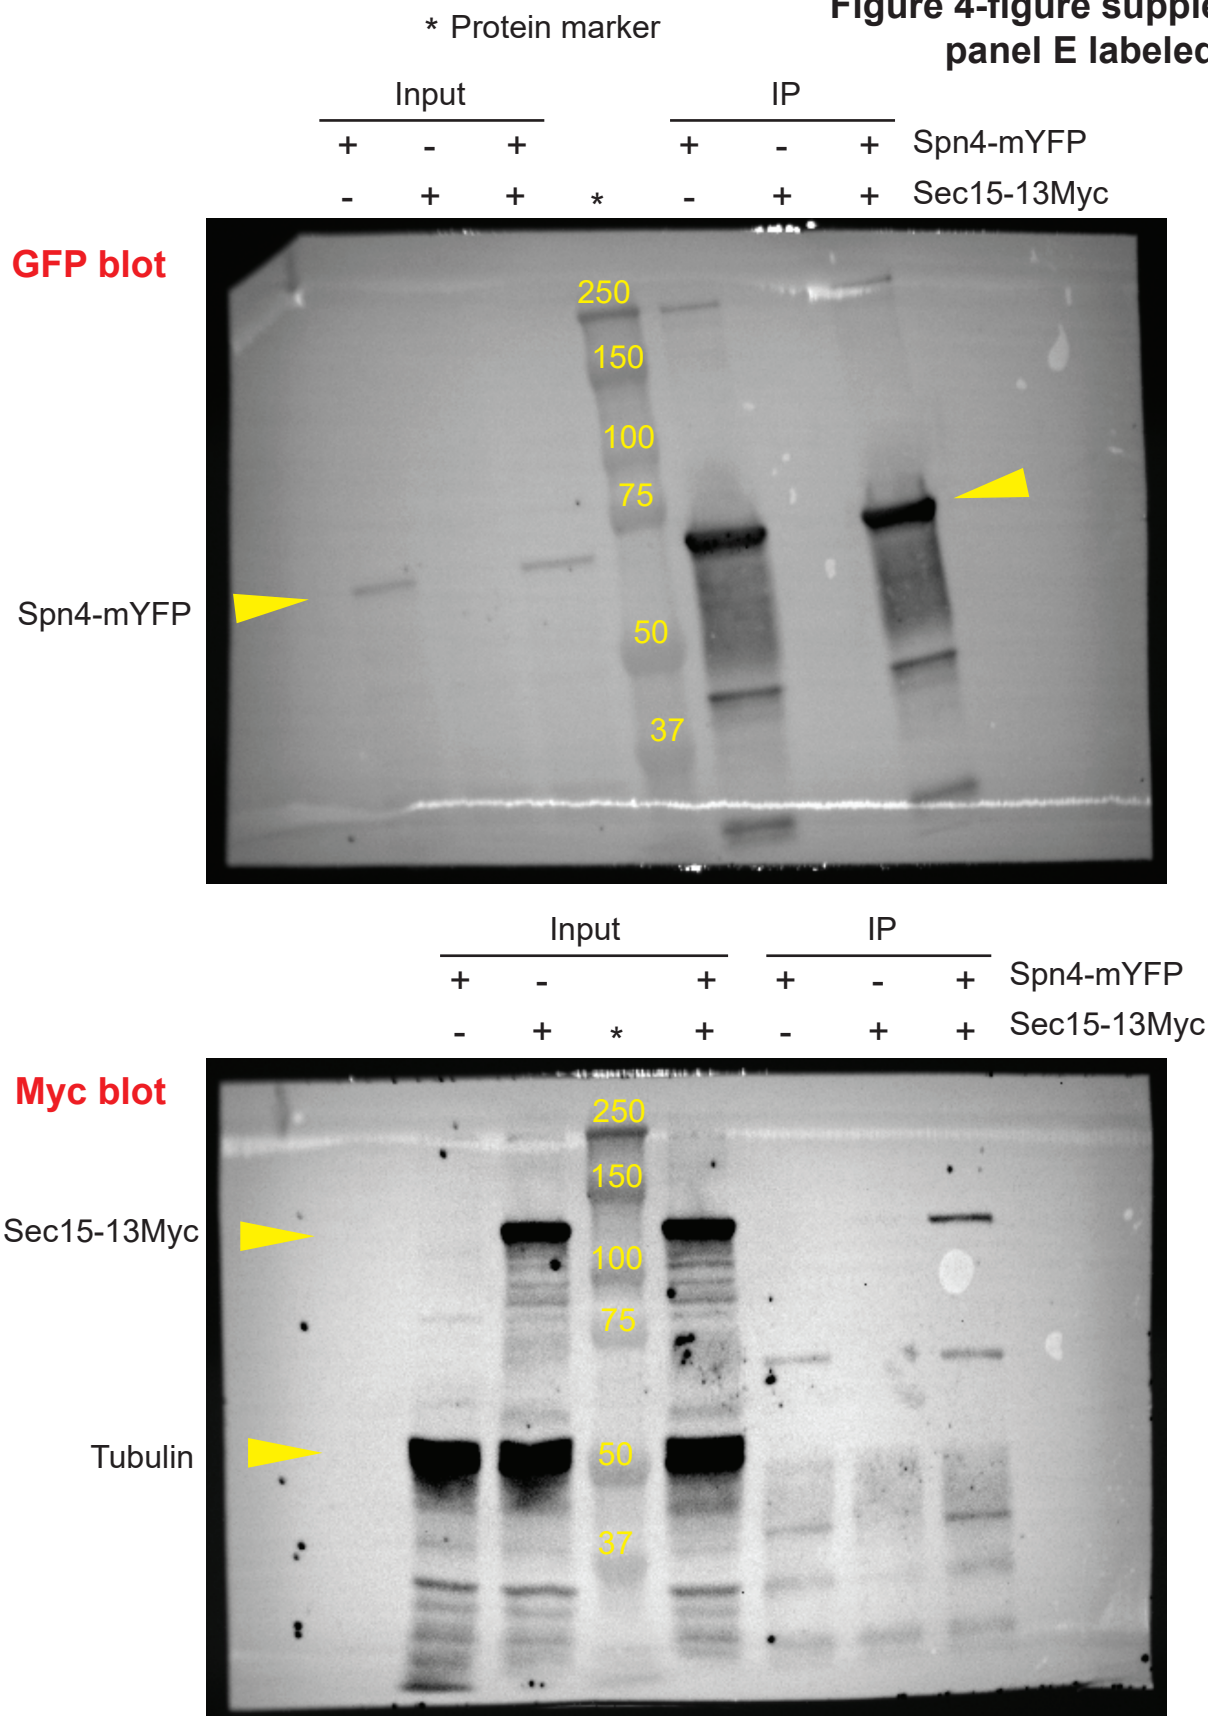

**Note:** White illumination near the edges of the blots are unwanted reflection of liquid from membrane and does not appear in chemiluminescence channel.

**Note:** Contrast was adjusted to see tubulin bands clearly from same Myc blot for the original figure in paper.

Figure 4-figure supplement 1  
panel F labeled

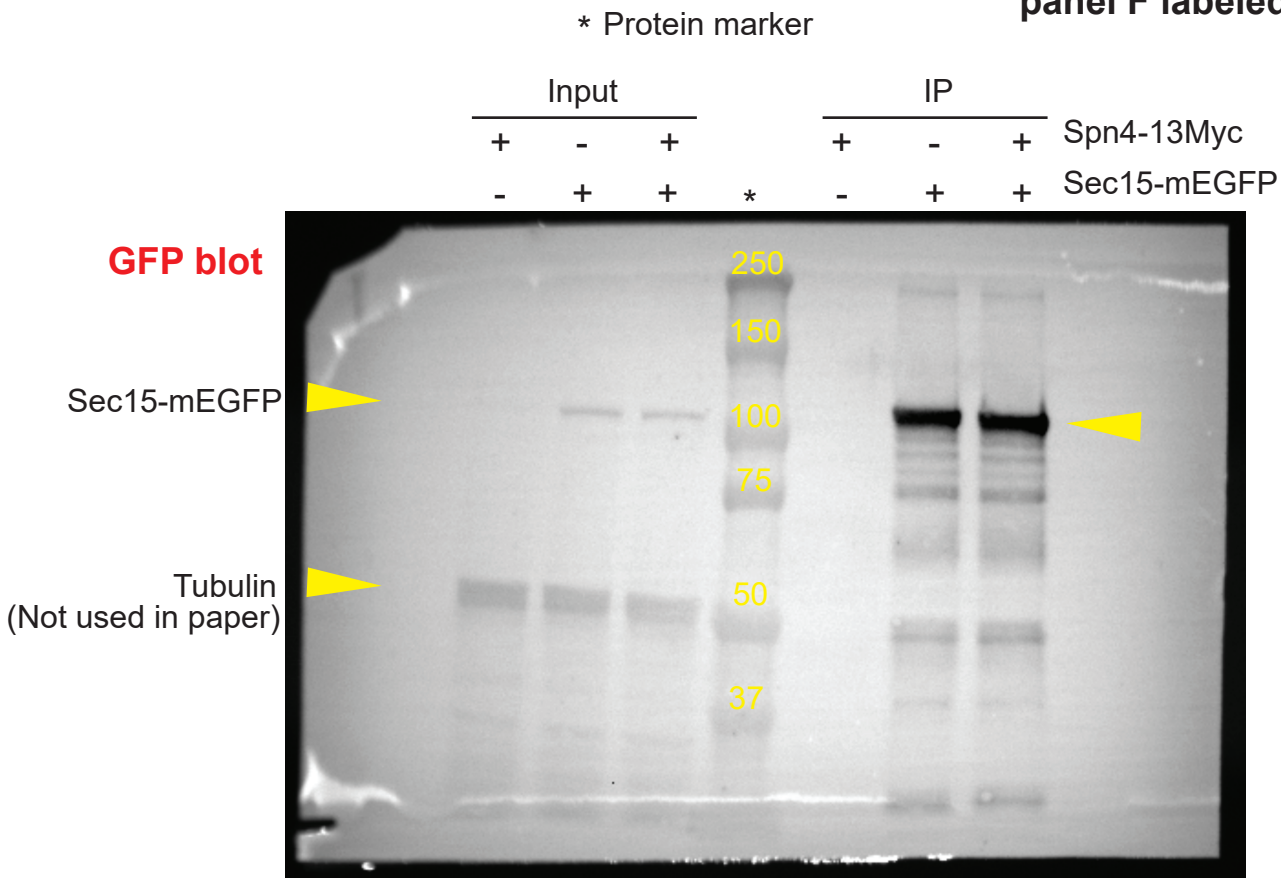

**Note:** White illumination near the edges of the blots are unwanted reflection of liquid from membrane and does not appear in chemiluminisence channel.



**Figure 4-figure supplement 1  
panel F labeled**

\* Protein marker

Input

IP

|   |   |   |   |   |   |   |             |
|---|---|---|---|---|---|---|-------------|
| + | - |   | + | + | - | + | Spn4-13Myc  |
| - | + | * | + | - | + | + | Sec15-mEGFP |

**Myc blot**

Spn4-13Myc  
Tubulin  
(Not used in paper)

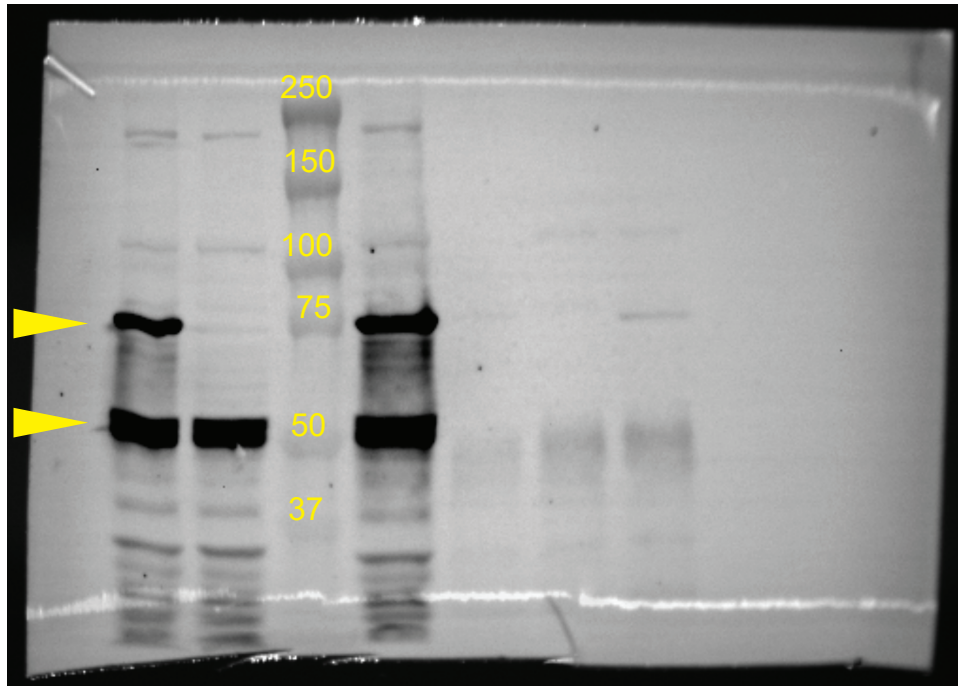

Input

IP

|   |   |   |   |   |   |   |             |
|---|---|---|---|---|---|---|-------------|
| + | - |   | + | + | - | + | Spn4-13Myc  |
| - | + | * | + | - | + | + | Sec15-mEGFP |

**Myc blot**

Spn4-13Myc  
Tubulin

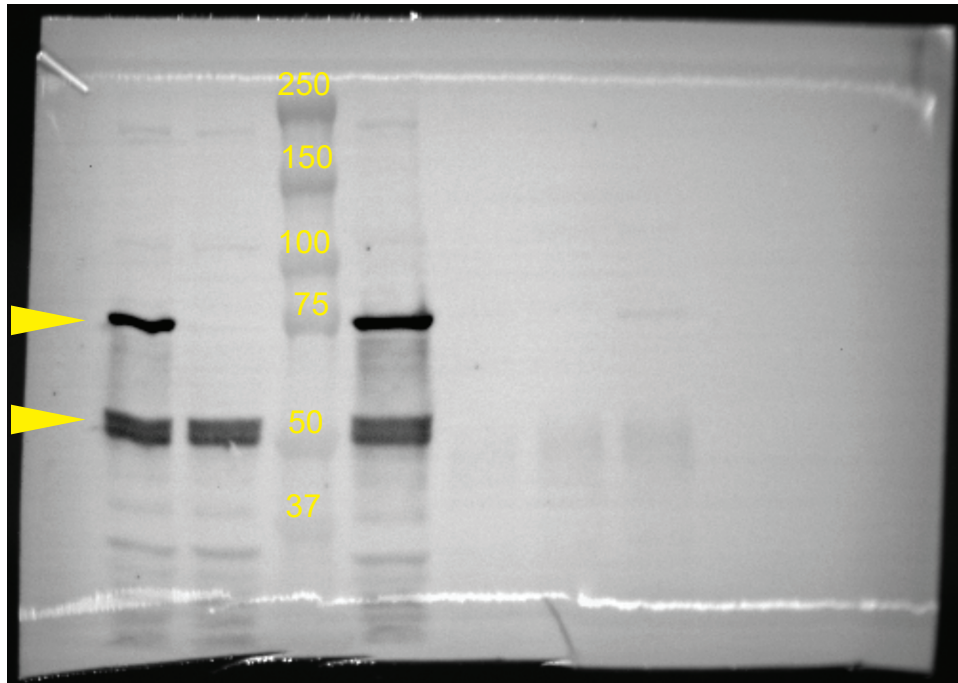

**Note:** White illumination near the edges of the blots are unwanted reflection of liquid from membrane and does not appear in chemiluminescence channel.

Figure 4-figure supplement 1  
panel G labeled

\* Protein marker      # Irrelevant lane

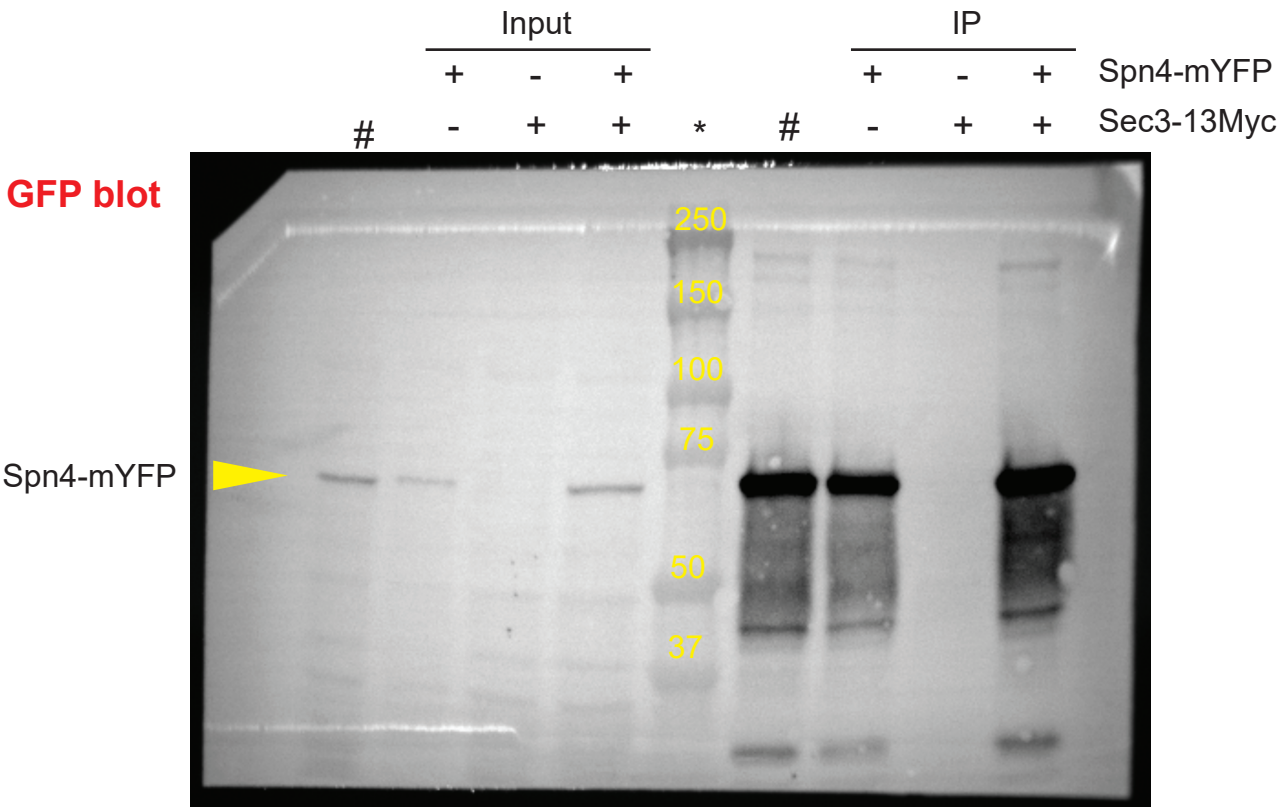

**Note:** White illumination near the edges of the blots are unwanted reflection of liquid from membrane and does not appear in chemiluminisence channel.

Figure 4-figure supplement 1  
panel G labeled

|                  |                   |   |   |   |    |   |   |            |
|------------------|-------------------|---|---|---|----|---|---|------------|
| * Protein marker | # Irrelevant lane |   |   |   |    |   |   |            |
|                  | Input             |   |   |   | IP |   |   |            |
|                  | +                 | - |   | + | +  | - | + | Spn4-mYFP  |
| #                | -                 | + | * | + | #  | - | + | Sec3-13Myc |

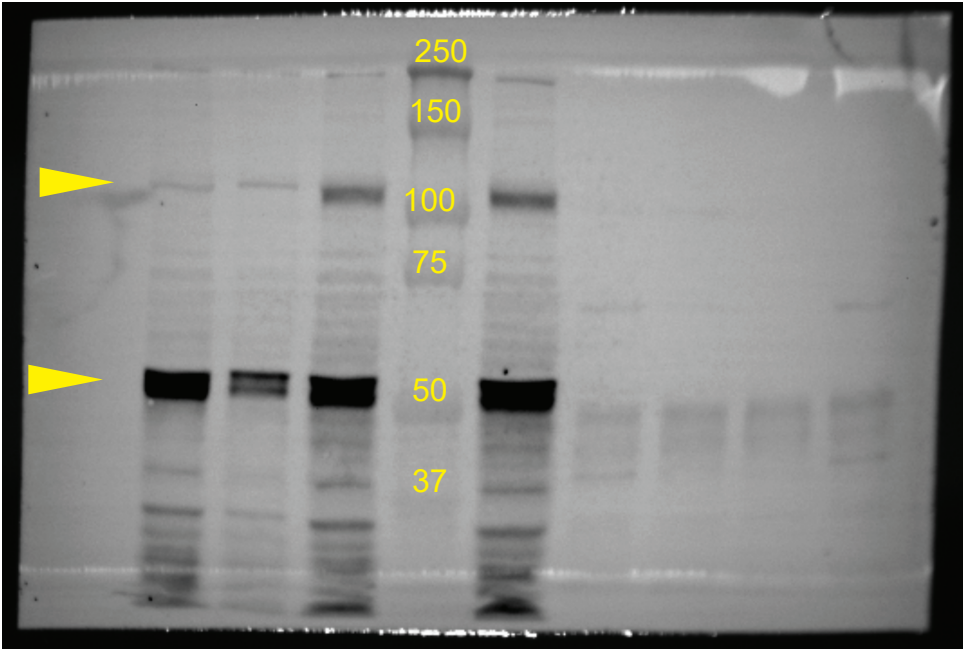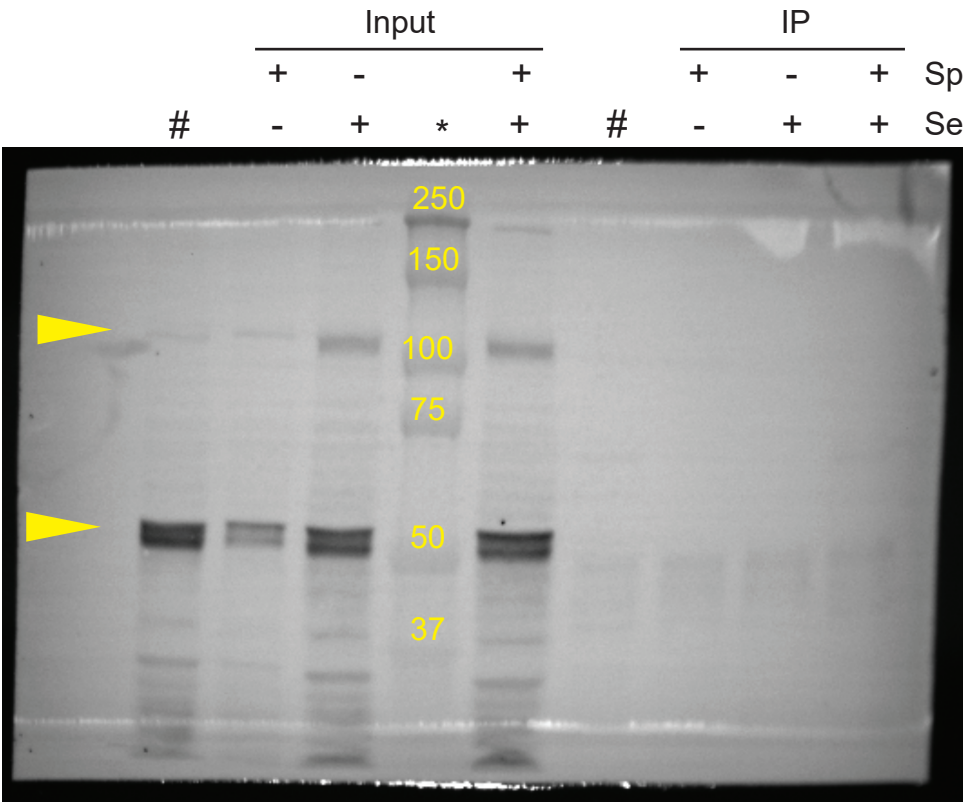

**Note:** White illumination near the edges of the blots are unwanted reflection of liquid from membrane and does not appear in chemiluminisence channel.



**Figure 4-figure supplement 1  
panel H labeled**

\* Protein marker

| Input |   |   |   | IP |   |   |            |
|-------|---|---|---|----|---|---|------------|
| +     | - | + |   | +  | - | + | Spn4-13Myc |
| -     | + | + | * | -  | + | + | Sec3-GFP   |

**GFP blot**

Sec3-GFP  
Tubulin  
(Not used in paper)

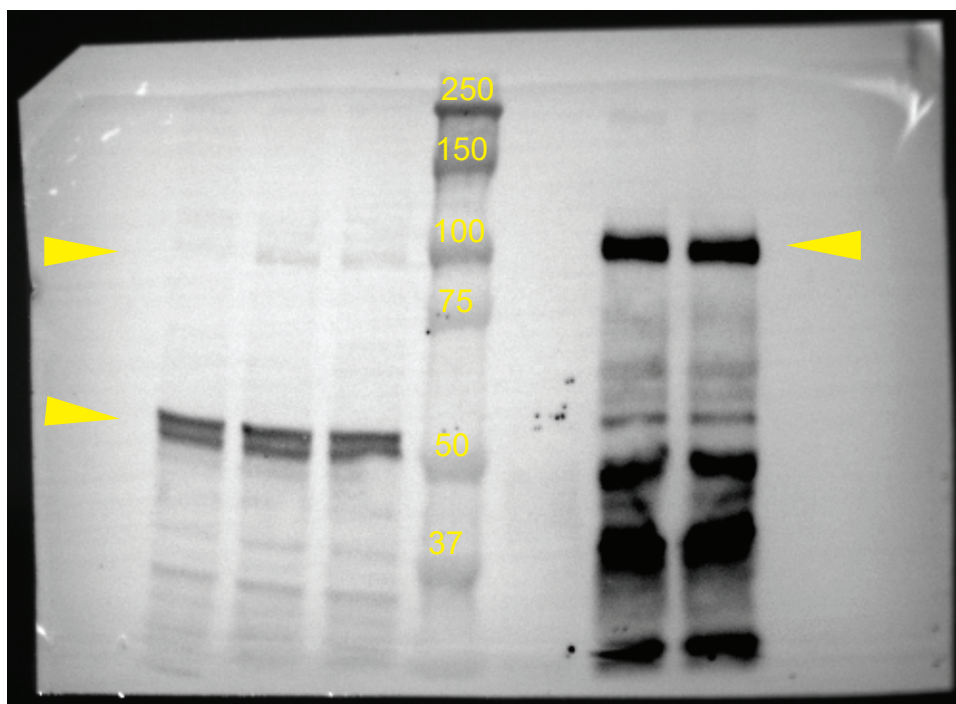

| Input |   |   |   | IP |   |   |            |
|-------|---|---|---|----|---|---|------------|
| +     | - | + |   | +  | - | + | Spn4-13Myc |
| -     | + | + | * | -  | + | + | Sec3-GFP   |

**GFP blot**

Sec3-GFP  
Tubulin

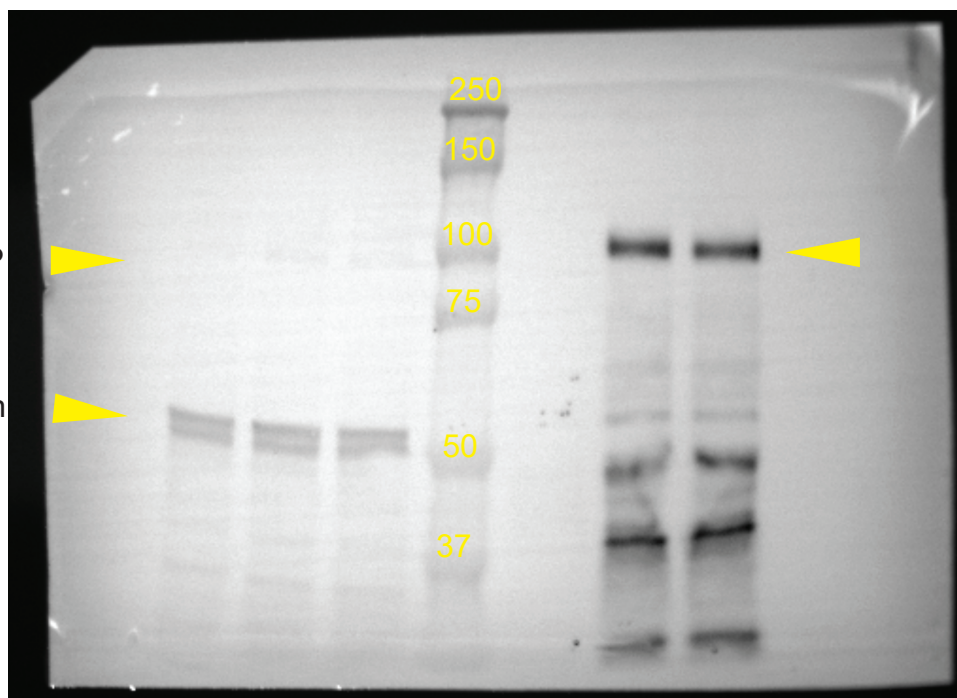

**Note:** White illumination near the edges of the blots are unwanted reflection of liquid from membrane and does not appear in chemiluminisence channel.



**Figure 4-figure supplement 1  
panel H labeled**

\* Protein marker

| Input |   |   |   | IP |   |   |            |
|-------|---|---|---|----|---|---|------------|
| +     | - |   | + | +  | - | + | Spn4-13Myc |
| -     | + | * | + | -  | + | + | Sec3-GFP   |

**Myc blot**

Spn4-13Myc

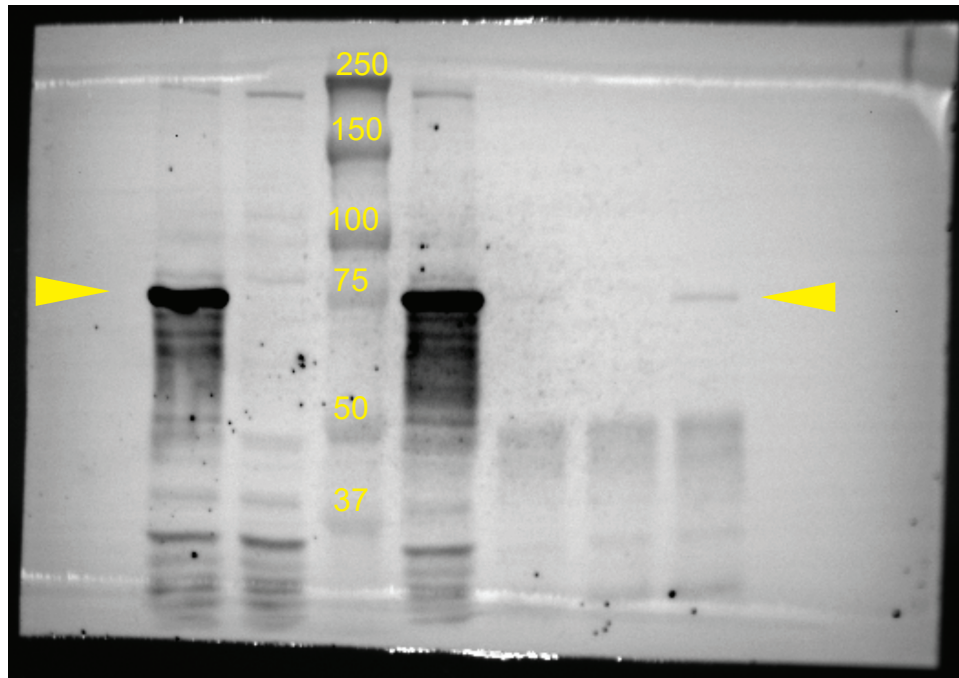

**Note:** White illumination near the edges of the blots are unwanted reflection of liquid from membrane and does not appear in chemiluminisence channel.
