# Supplementary material for: Septins function in exocytosis via physical interactions with the exocyst complex in fission yeast cytokinesis
Source: eLife. 2025 Oct 31;13:RP101113. doi: 10.7554/eLife.101113 (PMC12578440; doi:10.7554/eLife.101113)
Supplement: Supplementary file 2. [file elife-101113-supp2.xlsx]

## Sheet: DNA oligos list
New primers used in this study
Figure 1	Sequence
Spn1 Ctag F	TCACAAAAATCGGTTAATGCAAGCTAAAGCTGCGGCCGAAAATGAGAAGAGTAAAAGGAAGTTTTTTAAACGGATCCCCGGGTTAATTAA
Spn1 Ctag R	TTAAATAACAAAGAAGGAGATAGCAGTAGAACTGCGGTGTCATACAAATAAATATCAGCTAGTAAGGAGAGAATTCGAGCTCGTTTAAAC
Sad1 Ctag F	CGAACAACCAATACCTTCTTTAGGTGAGAAAGCCGAAAGTACTGCAGAGAATACGGGTCAAGATTCATCTCGGATCCCCGGGTTAATTAA
Sad1 Ctag R	GAATCGCTCTTTTATGATCTTCAAACCATTCCAGGCTAGATTATTTTTATATCTTACATTTTGTAGGTCTGAATTCGAGCTCGTTTAAAC
Figure 2
Sec3 Ctag F	CTTATTTTCCCTAGAGTTGTCTACTGCATTAAATGGCGTCATTAATATAGAGCAACAACCAAGCCGTAGACGGATCCCCGGGTTAATTAA
Sec3 Ctag R	CATCTGGATTCCGTTTAGTTCAAATAAATAAGTATTTTAATCTTTCGATATTTGTCGTGAAGCATTTGTAGAATTCGAGCTCGTTTAAAC
Sec3 Ctag chk F	AACTCTTGTTACTTCCATTCCGAC
Sec3 Ctag chk R	AATCCAAAACTTCTAAGATGGACG
Figure 2-figure supplement 1
Gef3 KTF	CAAACGCGCTACGAACTCCTAAGTGCCCGCGTTTGAGTAGATAACTCATTGAATCAACAGCCGATTAAAGCGGATCCCCGGGTTAATTAA
Gef3 Ctag R	AGAGAAATAACTTAAGTTCAAAAAGTCGATTAGTAACGGAAGTCATTGGAATATCCGTAATATCGTGTATGAATTCGAGCTCGTTTAAAC
Gef3 KTF chk F	AAAGCGGAATTCTTTCCTATATCC
Gef3 Ctag chk R	ATGTTTCTGCGTGACAAAATTAGA
Figure 4
Spn2 Ctag F	CGCAACTAGAATGGGAAGTCCCGCACCTGTGTACCCTTCTGAACCACATCTCCATACAGCCACCGCTCAACGGATCCCCGGGTTAATTAA
Spn2 Ctag R	ACGGTACGACAGTCATACAAATGGTTTAGTCTTTGTTCTAAACATACTATATATTACCTTAGGAAGAAGAGAATTCGAGCTCGTTTAAAC
Spn2 Ctag chk F	GTAGATGGAAGGCCTATTCGTG
Spn2 Ctag chk R	AAGAATTTAAACTTCGGGCACA
Sec15 Ctag F	TAATCCCCTTAGCAATGATCGACCAAAGCGAAGGGCCATTGAAATTTTAATAGCTACTTTGAAGAAAAGA CGGATCCCCGGGTTAATTAA
Sec15 Ctag R	AGATAGTTAATTAATTCCCCGAAAACACATTTAACTATATCAATAAATGAAATTATCGTTGAAGGATCTGGAATTCGAGCTCGTTTAAAC
Sec15 Ctag chk F	GGTTTCAAATTGGACGTTGAGT
Sec15 Ctag chk R	AGAACCATCAGCTGGACAAAAT
pVP16-Spn1 F	GGGTCGGATCCTG ATGGCGTCAATGGTACTCGCGGA
pVP16-Spn1 R	TCTTCGCGGCCGC CTATTTAAAAAACTTCCTTTTAC
pVP16-Spn2 F	GGGTCGGATCCTG ATGGAAGTTCCTTCTGCAGTTAC
pVP16-Spn2 R	TCTTCGCGGCCGC CTATTGAGCGGTGGCTGTATGGA
pVP16-Spn4 F	GGGTCGGATCCTG ATGAATGAAGAAGAGACAAACTT
pVP16-Spn4 R	TCTTCGCGGCCGC CTAACGTTTGCGAGAGCTGGTAG
pGBT9-Sec15 F	ACTGTATCGCCGGAATTCCCG ATGGATATAGATGTCTTGGAGTTTGTAGATAAGATTGCTT
pGBT9-Sec15 R	CTGCAGGTCGACGGATCCCCGG CTATCTTTTCTTCAAAGTAGCTATTAAAATTTCAATGGCC
pGBT9-Sec6 F	ACTGTATCGCCGGAATTCCCG ATGACCGCTGCCGCATCGGATGATGCTGTCTATAACAAGG
pGBT9-Sec6 R	CTGCAGGTCGACGGATCCCCGG TCATAAAATTGAACTTCCAGAAAGAGACGTGACTTGGG
pVP16-Spn1(300-469) F	GGGTCGGATCCTG GCTTCTAATACATTCGTGG
pVP16-Spn1(300-469) R	TCTTCGCGGCCGC CTATTTAAAAAACTTCCTTTTACTC
Figure 4-figure supplement 1
Sec6 Ctag F	CCAAATAGACACTTCGCAACAACCGACAGTATTTTCCCAAGTCACGTCTCTTTCTGGAAGTTCAATTTTACGGATCCCCGGGTTAATTAA
Sec6 Ctag R	AGGAACATTACTATAGGTAAAGATAAACCGTACGTAGATCATTAAAATTCAGCAACGACTACTTTGGATCGAATTCGAGCTCGTTTAAAC
Sec6 Ctag chk F	AACAAGAATGCATGTTTCGATG
Sec6 Ctag chk R	GGTTCGTTGGGTCATCATCTAT
Spn4 Ctag F	GCATGTTCAAATAAAACAAATTGAACTTGAAATCGAACGACTAAAGGCGGCTACCAGCTCTCGCAAACGTCGGATCCCCGGGTTAATTAA
Spn4 Ctag R	GTATGGTTCACTAGCAAACAAACCCAAATGATAATTGGGTATCAAGTTTCGTTATATTTTAACATTATCTGAATTCGAGCTCGTTTAAAC
Spn4 Ctag chk F	TCAAGGAATCATTAATTGCATGCCATTC
Spn4 Ctag chk R	ACAAAGCCTCGTGCACTCAAACACACG
Figure 5
Sec5 Ctag F	CATAAGTCCGACTACGGAAACAGCTACGAAAACACGACTCAAGTTTCAGTTTATTGAAATGATCTTTTCACGGATCCCCGGGTTAATTAA
Sec5 Ctag R	GCTATGCAAATGATTTTATATATGTTTGGAAAGATTGTAAAGTAATTCTACTATTAATAATAATATAATAGAATTCGAGCTCGTTTAAAC
Sec5 Ctag chk F	CCATATCCAAGTTGAGCATTCA
Sec5 Ctag chk R	ACCACTGGTTGGAGAGTTGAGT
Figure 6
Spn1-KTF	GGTTAAGTTTAATTTCCTACTTGAGCAAATAGATGTTCATGCTCGAGCTCCTAGCTACACTCTTCATCACCGGGATCCCCGGGTTAATTAA
Ypt3 Ntag F	TTGATATTATTTGACCTTAAATATTTGTTAACAAAAATTGTTCGTAGATTTACCGATAGAGAACTTAGCCGAATTCGAGCTCGTTTAAAC
Ypt3 Ntag GFP R	ACTTTCCAACACCACTATCCCCAATCAGCACAGTCTTGAACAAATAATCGTATTCGTCCTCTTGACACATTTTGTATAGTTCATCCATGC
Ypt3 Ntag chk F	TAGCGCTTTATAGTGAACAACAGC
Ypt3 Ntag chk R	TAAATTCATTCCTAGTGAAACGCA
Table 1 and 2
Spn2 KTF	TTGCTTCACGTTACAATGTTGACTTGGCCAAAACCAACAAATTCCAAATTCATTCAATTCGCAACTTGCACGGATCCCCGGGTTAATTAA
Spn3 KTF	TCTTTTACAACGTACAATACATTCTTTGATTGTTCATCCTACCTTACTATGACACGGTATTGATAAAAGACGGGATCCCCGGGTTAATTAA
Spn3 Ctag F	CTGCTTCTACTGCTGCCATGGCAAATGCCAGCGTTTCAACCCTTCCATCTTCAGTGTCTTCAACTAATCATTCCCAGTCACGGATCCCCGGGTTAATTAA
Spn3 Ctag R	CAGAAACAAAAGAAAGAAAACAACAGCTCCAAAACATGAAATATATGTTACAAGTAGCGCACTATGCACCATTAAATTGG
Spn4 KTF	CATTTATGCTTTAATAAAACTAATAACAATTCTCTTGCATTTTTTGGAAACTTTTTTATTTAGTTTGGAAGCTTTTAAGTCGGATCCCCGGGTTAATTAA
Spn4 KTF chk F	TTAACCTATCCCTACGCCCACTATGC
